# Supplementary material for: Brief communication: Nonlinear sensitivity of glacier-mass balance attested by temperature-index models
Source: Copernicus journal article supplement (doi:10.5194/tc-2022-210), 2022-10-28
Supplement: Supplementary file [file tc-2022-210-AC1-supplement.pdf]

## **Reply to Reviewers :**

*We have complied with all the comments made by Reviewers (see the point-by-point response). The replies are in italics.*

*The manuscript has been revised by a professional native speaker (not this Reply).*

## **Reply to Reviewer 1 (J. Bolibar):**

*First, we would like to remind kindly the obligations for a referee as mentioned in the following paragraphs of policies of The Cryosphere journal:*

*« 4. A referee should be sensitive even to the appearance of a conflict of interest when the manuscript under review is closely related to the referee's work in progress or published. If in doubt, the referee should return the manuscript promptly without review, advising the editor of the conflict of interest or bias.*

*5. A referee should not evaluate a manuscript authored or co-authored by a person with whom the referee has a personal or professional connection if the relationship has the potential to bias judgement of the manuscript. »*

*One can conclude that there is here a clear conflict of interest.*

*However, we have complied with all the comments made by Reviewer 1, below.*

## **General comments :**

Vincent and Thibert present a brief communication with an experiment based on two French alpine glaciers, which shows the response of point glacier mass balance at different glacier altitudes and glacier-wide mass balance to temperature and precipitation changes. This study is designed as a reply to the Nature Communications paper "Nonlinear sensitivity of glacier mass balance to future climate change unveiled by deep learning" by Bolibar et al. (2022). They claim that Bolibar et al. (2022) suggest that temperature-index models cannot capture nonlinear responses with respect to temperature and precipitation changes, and they aim at demonstrating the opposite.

This study serves as an extension to Bolibar et al. (2022), performing some additional analysis with temperature-index models that were not covered in that study. In that aspect, it serves to shed some additional light into the topic of glacier mass balance response to climatic changes. However, the scope of the study is very limited, and one is left feeling that only a few elements are analysed, often via cherry picking. My main concern regarding the study are the methods and the absence of objectivity in some of their claims. There is a lack of consistency in the way the information is presented and with which the different analyses are carried out. I will cover more in detail each one of these aspects in the following subsections of the global comments.

### **1.1 General comment 1: Cherry picking of sentences out of context**

The first concern regarding this paper is the deliberate attempt to cherry pick sentences out of context in order to drive a point home. The most notorious of these is the widely repeated one in this study of "temperature-index models can only provide a linear relationship between positive degree-days (PDDs), solid precipitation and mass balance (MB)". While it is true that such a sentence is written in the article, many nuances are added around it. Bolibar et al. (2022) mention twice (pages 5 and 8), that the linear response to temperature is related to each individual degree-day factor (DDF), and that a temperature-index model with two DDFs (like the one in this study) virtually acts as a piece-wise function, able to partially account for some of the nonlinearities. The authors seem very fixated with that idea, and seem to neglect this information altogether, showing a lack of objectivity. In that sense, this study serves to corroborate this hypothesis presented in Bolibar et al. (2022). Fig. 4c and Fig. 5 clearly display the piecewise behaviour of a temperature-index model with two DDFs. In that sense, I

believe it is important to nuance the message presented in this article, acknowledging the fact that this was already mentioned in Bolibar et al. (2022). This study is presented as an opposition to the message of Bolibar et al. (2022), whereas in fact it is building on top of it and corroborating a message evocated in that study. I would ask the authors to update all references to this sentence and to incorporate the elements described in this section into their study.

*First, we recognize the novelty of the approach of the authors. We are convinced that the deep artificial neural network (ANN) approach is a promising new empirical approach to simulate surface MB in the future, as it has been done in Bolibar et al. (2020) and in Bolibar et al. (2022).*

*Our unique purpose is to show that temperature-index models are able to capture nonlinear responses of glacier mass balance (MB) to high deviations in air temperature and solid precipitation.*

*Bolibar et al. (2022) argue that temperature-index models provide only linear relationships between positive degree-days (PDDs), solid precipitation and MB. Our statements do not result from "cherry picking" as shown below.*

1) *First, the title of Bolibar et al (2022): « Non linear sensitivity of glacier mass balance to future climate change unveiled by deep learning » implies that previous approaches at hands (not only temperature index-based approaches) were linear in comparison to the new ANN approach.*

2) *In the abstract of Bolibar et al. (2022), one can read : « Deep learning captures a nonlinear response of glaciers to air temperature and precipitation, improving the representation of extreme mass balance rates compared to linear statistical and temperature-index models. Our results confirm an over-sensitivity of temperature-index model, often used by large-scale studies, to future warming. » . These lines correspond to 4 lines of Abstract (or 1/3 of the Abstract) and we do not think this falls under « cherry picking ».*

3) *In the Introduction of Bolibar et al. (2022), on can read : « This type of model uses a calibrated linear relationship between positive degree-days (PDDs) and the melt of ice or snow. The main reason for their success comes from their suitability to large-scale studies with a low density of observations, in some cases displaying an even better performance than more complex models. However, both the climate and glacier systems are known to react non-linearly, even to pre-processed forcings like PDDs, implying that these models can only offer a linearized approximation of climate-glacier relationships. »*

4) *In the results section of Bolibar et al. (2022), on can read : « In that study, a temperature-index model with a separate degree-day factor (DDF) for snow and ice is used, resulting in piecewise linear functions able to partially reproduce nonlinear MB dynamics ». However, they write in the following sentences: « Both the Lasso and the temperature-index MB model rely on linear relationships between PDDs, solid precipitation and MB. Therefore, their sensitivities to the projected 21st century increase in PDDs are linear. »*

5) *In Discussion of Bolibar et al. (2022), the authors justify the analogy between Lasso model and Temperature index model. They write : « At this point, it is important to clarify the different ways of treating PDDs in the Lasso and the temperature-index MB models analysed in this study in order to justify analogies » and they conclude : « Nonetheless, since they are both linear, their calibrated parameters establishing the sensitivity of melt and glacier-wide MB to temperature variations remain constant over time. »*

6) *When they analyse the glacier models in GlacierMIP, they bring some nuances: « Despite the existence of a wide variety of different approaches to simulate glacier dynamics, all glacier models in GlacierMIP rely on MB models with linear relationships between PDDs and melt, and precipitation and accumulation. Some of these models use a single DDF, while others have separate DDFs for snow and ice, producing a piecewise function composed of two linear sub-functions that can partially account for nonlinear MB dynamics depending on the snowpack. », but*

they finally conclude that « As we have previously shown, these models present a very similar behaviour to the linear statistical MB model from this study » (i.e Lasso model)

7) And in the last paragraph of Bolibar et al. (2022), the authors claim that « By unravelling nonlinear relationships between climate and glacier MB, we have demonstrated the limitations of linear statistical MB models to represent extreme MB rates in long-term projections. Our analyses suggest that these limitations can also be translated to temperature-index MB models, as they share linear relationships between PDDs and melt, as well as precipitation and accumulation »

Thus, the assertion of the linear behaviour of TI models is reiterated 7 times. We do not believe that we attempted “to cherry pick sentences out of context”

Reviewer 3 of our study wrote the same thing : « The Abstract of Bolibar et al. (2022) states twice very clearly that temperature-index models have a linear sensitivity. And even the title (“nonlinear sensitivity ... unveiled ...”) indirectly implies that previous approaches were linear in comparison to the new model. Even though the text indeed provides additional statements that actually better agree with the outcomes of this study, it is the Title and the Abstract that defines what readers take with them. »

However, again, our purpose is not to criticize the ANN approach used in Bolibar et al. (2022). Our purpose is to demonstrate—as far as this is not a novelty—the ability of temperature-index models to capture nonlinear responses of mass balance to temperature and precipitation changes. This would be a detail if the most glacier-mass projections in response to climate change in large-scale studies over the 21<sup>st</sup> century were not based on temperature-index models.

## 1.2 GC2: Model calibration and validation

Perhaps the most striking aspect of the methods is the lack of details regarding model calibration and validation. The authors present an equation used to model the mass balance, but they give no clues on how the two free parameters of the model (i.e. the DDFs of snow and ice) were obtained. The values are presented in the study, but one cannot know if these come from literature values or if these were calibrated somehow. Seeing the model fit from Fig. 1, I am inclined to believe that these two parameters were manually calibrated, but it is unclear how that was performed. • Is the model calibrated in an out-of-sample manner? Has the dataset been divided into a calibration/validation one and a test one? The model performance cannot be evaluated with the same data used for parameter calibration, otherwise one is overfitting the model and reporting wrong metrics . Please clearly explain how the model parameters have been calibrated, and if these have not been calibrated in an out-of-sample manner. • What is the actual out-of-sample performance of the model for these two glaciers? Please report standard metrics (e.g. RMSE, bias and  $r^2$ ) • Have you taken into account ice dynamics in this model? How do you account for glacier geometry changes? How is the topographical feedback taken into account? Please specify. • In Fig.1: why are there only MB simulations from 1990 onwards?

We agree that a little bit more can be said about the methods although these PDD models are widely used in the glaciological community. More details about mass balance, DDF calibration and DEM data are now given in the Data section. Point mass balances are calculated for each elevation, for Argentière and Sarnnes glaciers. In addition, we calculated the glacier-wide mass balance of Argentière glacier using the point mass balances for elevation range and geodetic mass balances (Vincent et al., 2009).

The degree-day factors for snow and ice are 0.0035 and 0.0055 m w.e.  $K^{-1}d^{-1}$  for Argentière glacier (Reveillet et al., 2017) and 0.0041 and 0.0068 m w.e.  $K^{-1}d^{-1}$  for Sarnnes glacier (Thibert et al., 2013). The calibration and validation of these factors have been done in (Reveillet et al., 2017) and (Thibert et al., 2013). It is not possible to provide more details in the present paper but further information can be found in these papers. Except if the degree-day factors for snow and ice are the same, the response

of temperature index model is not linear and different pairs of degree-day factors do not change the conclusions, as shown with the numerical experiments performed from synthetic data (Fig. 4 and 5).

In order to estimate the response of MB calculated from TI model, it is better to analyse the response of point mass balance, in order to get rid of dynamics feedbacks. We also ran numerical experiments over the entire glacier surface and found similar results (Fig. 3).

The MB simulations of Argentiere glacier (Fig. 1) start in 1990 because the observed winter, summer and annual mass balances are not available before 1990 over the whole surface of the glacier. The data performed before 1990 have been reconstructed from annual mass balance observations performed in the ablation area and a statistical model (Vincent et al., 2018). In addition, the data performed before 1990 do not correspond always to the end of ablation season. For the present study, we prefer to use observations which are not affected by potential large uncertainties.

Vincent, C., Soruco, A., Azam, M. F., Basantes-Serrano, R., Jackson, M., Kjølmoen, B., et al. (2018). A nonlinear statistical model for extracting a climatic signal from glacier mass balance measurements. *Journal of Geophysical Research: Earth Surface*, 123. <https://doi.org/10.1029/2018JF004702>

### 1.3 GC3: Interpretation of the glacier mass balance nonlinearities

An important aspect regarding this study is the interpretation of the nonlinear response of glacier mass balance to different climatic drivers (air temperature and winter snowfall in this case). The authors correctly point out that the reason behind the nonlinearities captured by their temperature-index model are the changes in duration of the accumulation and ablation season, which impact the snow/ice coverage ratio. While this is indeed one of the multiple nonlinear effects present in the response of glacier MB to climatic drivers, it is not the only one. The global picture is much more complex than that, with a complex combination of multiple feedbacks. These nonlinear effects are linked to the non stationarity of model parameters (i.e. DDFs for snow, firn and ice) in both the temporal and spatial dimensions. These can vary in magnitude, and depending on the topographical and climatic setup of each glacier, one might be more important than the other. From our current understanding of these processes, these are the main ones.

1. The influence of variations of the surface energy budget components under climate change: This was the main topic of discussion and the most important result in Bolibar et al. (2022). Since the role of shortwave radiation in the energy budget in the past (i.e. the calibration period) is higher than in the future under climate change, its importance is bound to decrease in the future. This results in a REDUCED sensitivity of DDFs (particularly of ice, due to its lower albedo) to future warming. This corroborates many studies in the literature that also encountered an overestimation of DDFs sensitivity to future warming. For the whole region of the French Alps, Bolibar et al. (2022) found that this was the main nonlinear effect, driving differences in projected mass balance changes. Nonetheless, Bolibar et al. (2022) found that this was true only for glaciers with long response times or flat glaciers, due to the reduced effect of topographical adjustment. This nonlinearity affects parameters in the TEMPORAL dimension, resulting in a decrease in sensitivity over time, as air temperature rises.

2. The influence of different surface types and therefore different DDFs in the temperature-index model: The use of multiple DDFs for snow, firn and ice results in a nonlinearity in the SPATIAL domain. This nonlinear response will be affected by the spatial distribution of snow, firn and ice over the glacier. This spatial distribution will indeed also change through time, which will determine the switch between DDFs in the ablation season. Nonetheless, it is highly tied to glacier hypsometry. As reported in this study, in a warming climate, this lengthening of the ablation season exposes more ice surface linked to higher DDFs and therefore INCREASES the sensitivity.

3. Surface albedo: Changes in surface albedo through time also introduce a nonlinear response to warming in the TEMPORAL domain. These are also linked to 1, but they produce an opposite effect. Generally, in a warmer climate, surfaces tend to darken, thus further INCREASING the sensitivity of DDFs. As mentioned, this process works in opposition to 1, so depending on the different topoclimatic setups, one might become more important than the other one.

4. Glacier hypsometry: This one affects both the previous processes, and it serves to display how complex are the interactions between all these feedbacks. As explained in Bolibar et al. (2022), flatter glaciers or glaciers with a long response time will display less topographical adjustment, thus enduring more extreme air temperatures. This will result in more climatic extremes and therefore increased nonlinear effects due to the reduced influence of shortwave radiation. Therefore, flatter glaciers will tend to display REDUCED sensitivities to warming, whereas steep glaciers will not see many differences. The results of this study help shed light on the above-mentioned point 2, but one should not jump too quickly to conclusions just because a model does display nonlinearities. As I just tried to argue, these nonlinear responses are combined in complex manners, and they 3 are not straightforward to disentangle. While Bolibar et al. (2022) found that the above-mentioned point 1 seemed to be the most important nonlinear effect for the French Alps, this will most likely vary depending on the region and climate scenarios. More studies are needed to try to disentangle these nonlinear effects and to better understand their importance and effects for a wide range of topo-climatic setups. In that sense, I believe it is important to mention and take into account this global picture in the conclusions of this study. Therefore, I think the results related to these nonlinear response should be presented as one of the multiple nonlinear responses of MB to climate change. Temperature-index models can indeed partially capture as a piece-wise function nonlinear effects linked to the spatial domain, but it remains unclear which is the most important nonlinear effect for multiple glaciological regions. Framing the results in this wider context will help place the scientific contributions of this study into the big picture.

*Agree. We are convinced that there are many sources of nonlinear effects and this point has been widely discussed in the literature (e.g. Oerlemans and Klok, 2002; MacDougall and Flowers, 2011). However, it is beyond the scope of our study to discuss the numerous potential other causes of nonlinear response of mass balance to climate change. Our present study just aimed to prove that a simple temperature index-model is able to reproduce nonlinear responses of glacier mass balance to temperature and precipitation.*

*The limitations of the temperature index-models are obvious and widely discussed in previous studies (Huss et al., 2009; Gabbi et al., 2014; Réveillet et al., 2017). Among these limitations, one can note (i) the temporal variations of melt sensitivity to temperature and (ii) the fact that the physical link between temperature and melt is not direct...*

*Physical approaches which consider all energy exchanges between the glacier and the atmosphere and are able to represent snow melt spatial and temporal variability, such as those related to albedo variations that are hard to represent in Temperature index models. Such approaches offer higher transferability over time (e.g., MacDougall and Flowers, 2011) but require more accurate meteorological forcing (e.g., Gabbi et al., 2014).*

*Given the lack of available or reliable information on detailed future meteorological variables, most glacier-mass projections in response to climate change in large-scale studies over the 21<sup>st</sup> century have been based on temperature-index models (Huss and Hock, 2015; Fox-Kemper et al., 2021),*

*It is crucial to note the limitations of the temperature index models but it is also crucial to recognise that temperature-index models are able to capture nonlinear responses of mass balance to temperature and precipitation. This is the only topic of our study.*

*Gabbi, J. M. Carenzo, F. Pellicciotti, A. Bauder and M. Funk (2014) A comparison of empirical and physically based glacier surface melt models for long-term simulations of glacier response. J. Glaciol., 60, 1140–1154. doi:10.3189/2014JoG14J011*

*Huss, M., M. Funk and A. Ohmura (2009), Strong Alpine glacier melt in the 1940s due to enhanced solar radiation. Geophys. Res. Lett., 36. doi:10.1029/2009GL040789*

*MacDougall, A. H., and G. E. Flowers (2011), Spatial and Temporal Transferability of a Distributed*

*Energy-Balance Glacier Melt Model, J. of Climate, 24(5), 1480–1498, doi :10.1175/2010JCLI3821.1.*

*Oerlemans, J., and E. J. Klok (2002), Energy Balance of a Glacier Surface: Analysis of Automatic Weather Station Data from the Morteratschgletscher, Switzerland. Arct. Antarct. Alp. Res., 34, 477. doi:10.2307/1552206*

*Réveillet, M., C. Vincent, D. Six and A. Rabatel, A (2017), Which empirical model is best suited to simulate glacier mass balances? J. Glaciol., 63(237), 39-54. doi:10.1017/jog.2016.110*

#### **1.4 GC4: Summer snowfall anomalies and plotting of nonlinear response**

Bolibar et al. (2022) encountered that the strongest nonlinear response (from a statistical point of view) came from summer snowfall anomalies. The authors argued that it was the combination of both air temperature and precipitation during summer that determined wide changes in MB sensitivity. As explained above, Bolibar et al. (2022) argue that this is due to a reduced role of short-wave radiation in future climate scenarios, resulting in a reduced sensitivity of DDFs. Summer snowfall anomalies are tightly linked to summer air temperatures and also the ratio between snow and ice coverage on a glacier. These two are closely linked to processes mentioned in point 1 and 2 above, and were found to be the clearest drivers of nonlinearities. The statistical methods of Bolibar et al. (2022) served to shed some additional light on the subject, and open the door to exploring new ways to disentangle these processes. However, they did not allow a clear separation and understanding of how these processes operate.

Another important aspect in the comparison between the nonlinear sensitivities of Fig. 3 in Bolibar et al. (2022) with respect to Fig. 2 of this study, is the use of equivalent axis and ranges of values. Right now, both figures do not share the same range of values, and as it was displayed in Fig. 3 of Bolibar et al. (2022), there is a reduced range of values that will be encountered by French Alpine glaciers in future climate scenarios for different RCPs. This is particularly problematic for the case of winter snowfall anomalies. In Fig. 2 of this study, slight nonlinearities are displayed below -1.2 m.w.e. and above +1.7 m.w.e. These values are way beyond anything that will be seen in the 21st century for French alpine glaciers, as displayed in the vertical dashed lines in Fig. 3 of Bolibar et al. (2022). The most extreme values that French alpine glaciers will see until 2100 will range between -0.7 m.w.e. to +1.2 m.w.e. Anything beyond these limits makes no sense from a physical point of view for this sort of analyses, and will have no impact in projections for this century. At the very least, Vincent and Thibert should admit that nonlinearities of MB shown by Bolibar et al. (2022) for very extreme anomaly values out of the range of future likely encountered values, must simply not be taken into account in their analyses. Additionally, one aspect that is not mentioned in this study is the fact that they are comparing the response of two glaciers with that of 660 glaciers. Bolibar et al. (2022) reported a strong variability in terms of mass balance sensitivity response to climatic forcings along different types of glaciers. The very reduced sampling used by Vincent and Thibert shows just a partial picture of all glaciers in the region. This should be specifically mentioned when presenting the comparisons. In order to better understand these effects and to better compare both methods, I believe it is necessary to add the response of summer snowfall anomalies to Fig. 2. This would allow a comparison with the most meaningful response of the methods of Bolibar et al. (2022). Moreover, the future ranges of extreme values encountered by these glaciers under future climate scenarios (e.g. using the ADAMONT8 product which is compatible with the SAFRAN9 product used in this study), should be added to Figs. 2 and 3. This would clearly indicate where the nonlinearities actually will come into play and where they will be just model extrapolations beyond physically plausible values. This would also show that the nonlinearities linked to winter snowfall anomalies illustrated in Fig. 3 of Bolibar et al.(2022) will never occur during the 21st century in the French Alps, as they are out of the range of the values simulated by climate models.

*As suggested in the previous comment, we have done numerical experiments to analyse the summer snowfall anomalies.*

*The results are reported below:*

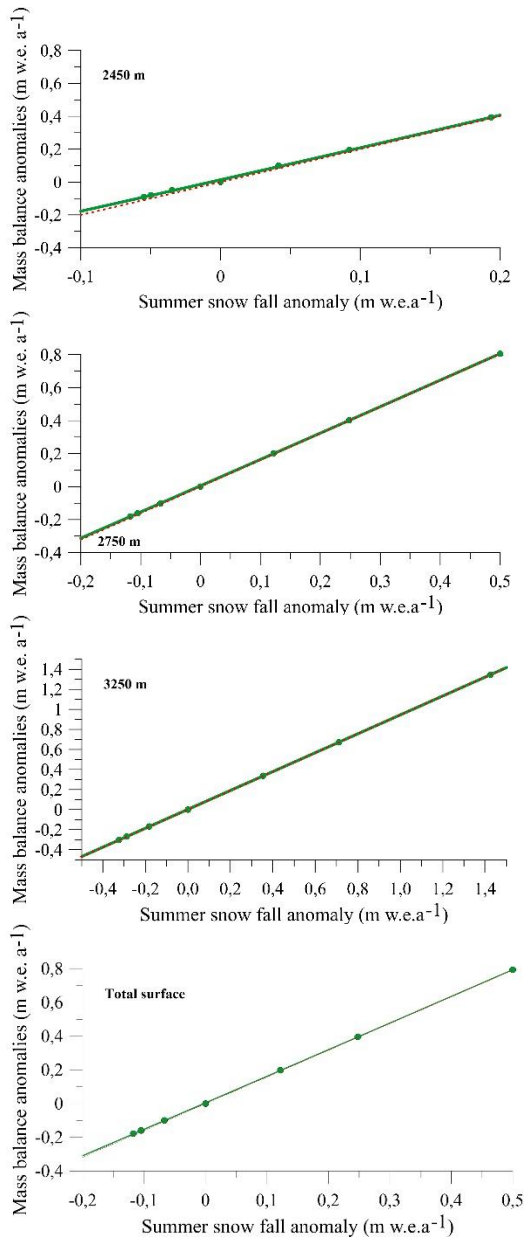

Figure: Surface mass balance anomalies against the summer snow fall anomalies, at Argentière glacier.

We found an almost linear response of SMB to summer snow fall anomalies. These results have been checked using the synthetic data. Here below, the mass balance anomalies have been calculated from synthetic data we have used in our paper. The snowfall anomaly has been changed by increment of +/- 100%. The sensitivity remains almost unchanged.

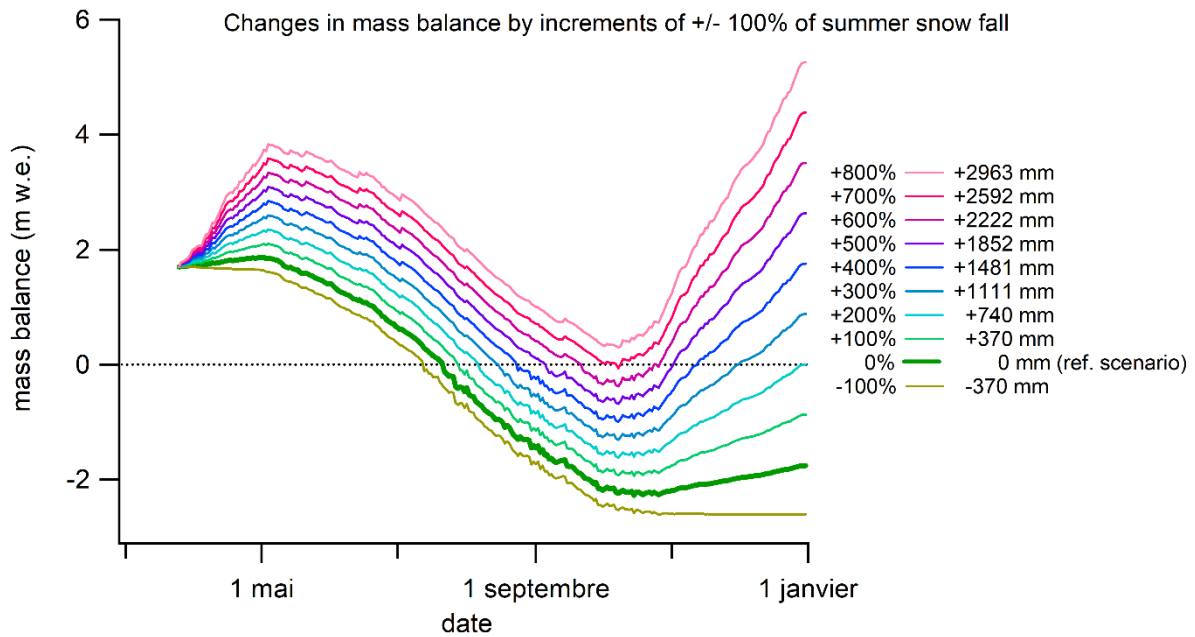

Figure: Surface mass balance calculated from synthetic data with different summer snow fall anomalies.

One can conclude that the response of SMB to summer snow fall anomalies, using degree day model is almost linear. The annual mass balance anomaly cannot be detected because the summer snow falls are low and do not affect significantly the sensitivity. Although the summer snow fall can affect the summer mass balance, the response to summer mass balance anomaly is almost linear. It is consistent with in situ observations given the low quantity of summer snow fall on alpine glaciers. In addition, in the future, the summer snowfall will be increasingly lower. It is very surprising that Bolibar et al. (2022) encountered that the strongest nonlinear response (from a statistical point of view) came from summer snowfall anomalies.

However, this new discrepancy with Bolibar et al. study is beyond the scope of our paper. Again, the topic of our paper is to demonstrate that the responses of degree day model to temperature and winter accumulation are non linear.

About the ranges of values of temperature and winter snow anomaly, the Reviewer 1 wrote: “the future ranges of extreme values encountered by these glaciers under future climate scenarios (e.g. using the ADAMONT8 product which is compatible with the SAFRAN9 product used in this study), should be added to Figs. 2 and 3.”

This request is beyond the scope of our study, given that our unique purpose is to show that temperature-index models are able to capture nonlinear responses of glacier mass balance (MB) to high deviations in air temperature and solid precipitation.

The last comment of CG4 of Reviewer 1 is surprising: “ Moreover, the future ranges of extreme values encountered by these glaciers under future climate scenarios (e.g. using the ADAMONT8 product which is compatible with the SAFRAN9 product used in this study), should be added to Figs. 2 and 3. This would clearly indicate where the nonlinearities actually will come into play and where they will be just model extrapolations beyond physically plausible values. This would also show that the nonlinearities linked to winter snowfall anomalies illustrated in Fig. 3 of Bolibar et al.(2022) will never occur during the 21st century in the French Alps, as they are out of the range of the values simulated by climate models. “

This last comment is surprising given that the nonlinearities to winter snowfall anomalies have been previously demonstrated in Réveillet et al (2018) using in situ observations and energy balance



modelling (see Figure 6b of Réveillet et al, 2018, replicated below in the reply to the comments of lines 97-98). It clearly shows that the nonlinearities linked to winter snowfall anomalies occurred during the 21st century in the French Alps yet.

Réveillet, M., Six, D., Vincent, C., Rabatel, A., Dumont, M., Lafaysse, M., Morin, S., Vionnet, V., and Litt, M.: Relative performance of empirical and physical models in assessing the seasonal and annual glacier surface mass balance of Saint-Sorlin Glacier (French Alps), *The Cryosphere*, 12, 1367–1386, <https://doi.org/10.5194/tc-12-1367-2018>, 2018.

## 1.5 GC5: Code and data availability

Another aspect that makes it hard to understand the methods is the fact that the source code used for this study is not shared. Following the principles of open science from *The Cryosphere* journal, I would strongly encourage the authors to share their code and data in an open repository (e.g. GitHub). This would make the study reproducible, and it would make it easier for reviewers and readers to understand what has been done. If the authors strongly oppose to this, I would still ask them to privately share their code for this review in order to correctly understand what has been done.

Field data are accessible through the project website at <https://glacioclim.osug.fr>.

Results from the PDD simulations on synthetic data are now accessible from the open data repository: [10.5281/zenodo.7603415](https://doi.org/10.5281/zenodo.7603415).

It has been added in the Code and Data Availability of the new version of our manuscript.

## 2 Specific comments

- L1 The current title does not give much information on what the sensitivity is linked to. I believe a correct title should be something like "Nonlinear sensitivity of glacier mass balance to future climate change attested by temperature-index models".

Agree. The title has been changed: "Nonlinear sensitivity of glacier mass balance to climate attested by temperature-index models"

- L18 The aspects regarding GC3 should be added here in the abstract.

The abstract length cannot exceed 100 words. In addition, and as mentioned above, it is beyond the scope of our study to discuss the numerous potential causes of nonlinear response of mass balance to climate change. Our present study just aimed to prove that a simple temperature index-model is able to reproduce nonlinear responses of glacier mass balance to temperature and precipitation.

- L33-35 This is one of the cherry picking instances mentioned in GC1. To be adjusted accordingly.

Disagree. As explained in detail in the reply to the comment 1, our statements do not result from "cherry picking".

- L53 How has the temperature been downscaled to be used in the temperature-index model? Two versions of SAFRAN exist: one divided by massifs and altitudinal bands, and another one in a grid. Which one of the two has been used?

Agree. Details have been added in the data section.

- L61 As per the comments on GC2: how have been these two DDFs been obtained ?

Details have been added in the Method section.

- L79 This is one of the cherry picking instances mentioned in GC1. To be adjusted accordingly.

*Disagree. As explained in detail in the reply to the comment 1, our statements do not result from "cherry picking"*

- L97-98 This sentence is lacking solid arguments to back it. Could you please elaborate? Which parts of the model calibration might have issues? All the models in Bolibar et al. (2022) were cross-validated, ensuring a correct out-of-sample validation and a good generalization outside the seen dataset. This study so far does not provide any information regarding parameter calibration. In order to correctly compare both models and draw conclusions, a good understanding of both model calibration strategies is necessary.

*We found a sensitivity increase with low winter-accumulation anomalies using our model. The physical reasons are explained in lines 111-121.*

*These conclusions are consistent with in-situ observations (Six and Vincent, 2014).*

*It is also consistent with the results of Reveillet et al. (2018) using observations and energy balance modelling. It has been well illustrated in Figure 6b of this paper:*

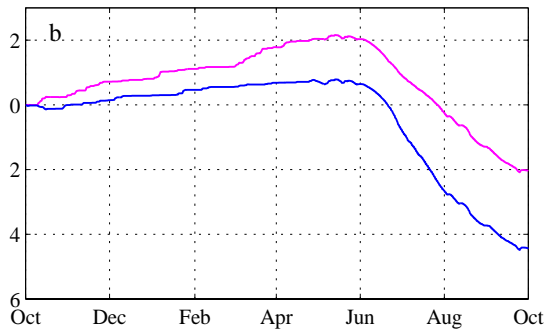

*Figure 6b of Réveillet et al. (2018): Surface mass balance at stake 10, over one hydrological year, using averaged summer conditions (over 1996–2015), 2000–2001 winter conditions (pink) and 2008–2009 winter conditions (blue), representing the two extreme results.*

*In Réveillet et al. (2018), the tests of the annual mass balance sensitivity to seasonal mass balance using the Crocus model were performed at seven stakes in the ablation area, ranging between 2700 and 2870 m a.s.l. Only the results for stake 10 (located at 2760 m a.s.l.) are presented in Fig. 6, but conclusions are similar for all the stakes. The difference between winter accumulation of these 2 years (2001 and 2009) is 1.2 m w.e. Using the same summer conditions, the difference at the end of the hydrological year is 2.4 m w.e. (i.e. twice the difference at the end of the winter season). Thus, from these results, one can conclude that the sensitivity of annual mass balance to winter accumulation is close to 100 % when the winter accumulation is close or exceeds 2.4 m w.e. (because the glacier is covered by the snow over the whole melting season). In the contrary, with very low winter accumulation, as observed in 2008/2009, the sensitivity of annual mass balance to winter accumulation is close to 200 % (1.2 to 2.4 m w.e). These results from observations and energy balance modelling are very consistent with the results shown in Figure 3 of our paper at 2750 m (right panel): the sensitivity of annual mass balance to winter accumulation is about 110 % when the anomaly of winter accumulation exceeds 1 m w.e. On the contrary, the sensitivity of annual mass balance to winter accumulation is very close to 200 % when the anomaly of winter accumulation is lower -1 m w.e.*

*In conclusion, these results show (i) a strong non-linear effect (ii) and an obvious increase in MB sensitivity with low-winter accumulation.*

*Therefore, a temperature index model (our study), a SEB model (Reveillet et al.; 2018) and field observations (Six and Vincent, 2014) report increased sensitivities of MB under low winter-accumulation conditions. The opposite result is obtained from the deep-learning model that is why one*

may suspect an issue in the calibration of the ANN model. Reviewer 3 also comments the ANN discrepancy on that point as “really intriguing”.

Réveillet, M., Six, D., Vincent, C., Rabatel, A., Dumont, M., Lafaysse, M., Morin, S., Vionnet, V., and Litt, M.: Relative performance of empirical and physical models in assessing the seasonal and annual glacier surface mass balance of Saint-Sorlin Glacier (French Alps), *The Cryosphere*, 12, 1367–1386, <https://doi.org/10.5194/tc-12-1367-2018>, 2018.

Six, D. and C. Vincent (2014), Sensitivity of mass balance and equilibrium-line altitude to climate change in the French Alps. *J. Glaciol.* 60, 867–878. doi:10.3189/2014JoG14J014

- L99-101 This is indeed true, and has already been reported in other studies. However, as argued in Bolibar et al. (2022) and as I explained in GC3, this is only part of the picture. This should be adjusted to mention that this is one of the multiple nonlinear processes in glacier mass balance sensitivity to climatic forcing, and that this process is a different one than the one reported in Bolibar et al. (2022).

*As mentioned above, it is beyond the scope of our study to discuss the numerous potential causes of nonlinear response of mass balance to climate change. Our present study just aimed to prove that a simple temperature index-model is able to reproduce nonlinear responses of glacier mass balance to temperature and precipitation.*

*In addition, the paper in Brief communication should be short.*

- L104-106 This is again a case of cherry picking. Bolibar et al. (2022) never claimed that ALL models in GlacierMIP 210 (not GlacierMIP 1, Hock et al. (2019), as stated by the authors) have linear relationships to PDDs and precipitation.

*This comment is very surprising and at complete odds with Bolibar et al. (2022) wrote (page 8), second column (lines 6-15) :*

*« Despite the existence of a wide variety of different approaches to simulate glacier dynamics, **all glacier models in GlacierMIP rely on MB models with linear relationships between PDDs and melt, and precipitation and accumulation.** Some of these models use a single DDFs, while others have separate DDFs for snow and ice, producing a piecewise function composed of two linear sub-functions that can partially account for non linear MB dynamics depending on the snow pack. **As we have previously shown, these models present a very similar behaviour to the linear statistical model from this study** ».*

*We do not understand this comment.*

L.104-106: To begin with, some of them use SEB. Bolibar et al.(2022) make a point that temperature-index models with a single DDF clearly behave like the Lasso; and even temperature-index models with 2 DDFs, can only partially account for the nonlinearities (and cannot capture the ones they show in their study). This is further corroborated by the comparisons made in that study between the Lasso MB model and the temperature-index MB model from GloGEM in the Supplementary material of Bolibar et al. (2022). To be modified accordingly.

*The authors Bolibar et al. (2022) are faced with a paradox: 1) they have to demonstrate that their ANN model captures a non linear response of glaciers to climate which has not been seen in the previous models, as claimed in their Title, but 2) they cannot deny that temperature-index models account for nonlinearities as recognized here and in our study.*

- L107-108 This is not accurate. The Open Global Glacier Model (OGGM), which was used in the paper as an example of this behaviour, also has a single DDF. In order to avoid further cherry picking, I would ask the authors to be precise about their claims. Out of the 11 models in Marzeion et al. (2020), 7 are using temperature index models (2 of them with a single DDF), 1 is using a simple parametrization relating MB to air temperature, 1 is using a mass balance gradient based on temperature indices, and 2 are using surface energy balance models. This means that at least 3

(potentially 4 if we take into account Kraaijenbrink et al. (2017)) models have direct simple linear relationships between PDDs and MB. The other 4 have 2 DDFs, which can partially account for nonlinearities (but not the ones from the above-mentioned point 1 in the temporal dimension).

*Here, we refer to **temperature-index models** of the Glacier Model Intercomparison Project (GlacierMIP) (Hock et al., 2019). Except for one model (that of Marzeion et al., 2014), all **temperature-index models** used in GlacierMIP include two degree-day factors and account for nonlinearities.*

*In Marzeion et al. (2020), 5 **temperature-index models** out of 7 **temperature-index models** used in GlacierMIP include two degree-day factors.*

*Anyway, we changed our statement and replaced: “This is erroneous given that, except for one model (that of Marzeion et al., 2014), all temperature-index models used in GlacierMIP include two degree-day factors.” by “This is erroneous given that, most of the temperature-index models used in GlacierMIP include two degree-day factors.”*

- L117-119 This is one of the cherry picking instances mentioned in GC1. To be adjusted accordingly.

*Disagree. As explained in detail in the reply to the comment 1, our statements do not result from “cherry picking”*

- L124-126 This was already done in that study. The results were shown in the Supplementary material. The exact same plots were not produced due to the difficulty of implementing that scheme on GloGEM. But the evolution of the MB for future scenarios was compared, yielding very similar results and responses to those of the LASSO. Therefore, the comparison between the LASSO and the TI model from GloGEM in terms of projected cumulative MB is not unfounded. Vincent and Thibert must point this aspect in an objective manner.

*We do not understand how the sensitivities can be similar between a TI model and LASSO model. Anyway, the sentence “We would suggest testing the capability of an ANN to capture nonlinearity by comparing its results with that of the GloGEM Positive Degree-Day (PDD) model that they used in their paper.” has been removed from our manuscript. It is also a suggestion of Reviewer 3.*

- L129-131 As previously discussed in GC3, this is because the TI model used in this study does not account for DDF evolution over time. To be mentioned here in order to clarify the bigger picture.

*We disagree. If the DDF were to change from year to year to account for the darkening of the ice due to longer ice exposition to the atmosphere (dust deposition, etc...), the sensitivity of MB to winter balance would much more increase under low winter accumulation conditions. Our model effectively does not account for such a process. Accounting for would increase the discrepancy with the ANN approach at this step.*

*In any case, it is beyond the scope of our analyses.*
